# Supplementary material
Source: publisher site journal article supplement (https://www.dovepress.com/article/277463)
Supplement: Supplementary file 1 [file get_supplementary_file.php]

| Supplementary Table S1. Poisson regression model for incident asthma using serum uric acid as a continuous independent variable | | | | | | | | | | | | |
| --- | --- | --- | --- | --- | --- | --- | --- | --- | --- | --- | --- | --- |
| Independent variables | Men | | | | Women | | | | Total | | | |
| IRR | 95% CI | | *P* | IRR | 95% CI | | *P* | IRR | 95% CI | | *P* |
| unadjusted covariates |  |  |  |  |  |  |  |  |  |  |  |  |
| SUA | 1.00 | 1.00 | 1.01 | 0.01* | 1.00 | 1.00 | 1.01 | 0.52 | 1.00 | 1.00 | 1.01 | 0.02* |
| adjusted covariates |  |  |  |  |  |  |  |  |  |  |  |  |
| SUA | 1.01 | 1.00 | 1.01 | 0.00* | 1.00 | 0.99 | 1.01 | 0.96 | 1.00 | 1.00 | 1.01 | 0.01* |
| Age | 1.02 | 1.00 | 1.04 | 0.04* | 1.01 | 0.99 | 1.03 | 0.42 | 1.03 | 1.01 | 1.05 | 0.00* |
| BMI | 0.95 | 0.86 | 1.04 | 0.28 | 1.01 | 1.01 | 1.02 | 0.00* | 1.00 | 0.99 | 1.01 | 0.72 |
| Gender | / | / | / | / | / | / | / | / | 2.36 | 1.33 | 4.19 | 0.00* |
| Drinking status | 2.14 | 1.10 | 4.16 | 0.03* | / | / | / | / | 1.96 | 1.02 | 3.77 | 0.04* |
| Smoking status | 1.53 | 0.76 | 3.08 | 0.23 | / | / | / | / | 1.54 | 0.78 | 3.03 | 0.22 |
| Rhinitis | 2.73 | 0.17 | 43.56 | 0.48 | / | / | / | / | 2.04 | 0.17 | 25.03 | 0.58 |
| Nasal polyps | 11.34 | 2.01 | 64.00 | 0.01* | / | / | / | / | 12.20 | 2.63 | 56.57 | 0.00* |
| Pulmonary infection | 0.25 | 0.02 | 3.79 | 0.32 | 1.17 | 0.24 | 5.68 | 0.84 | 0.46 | 0.08 | 2.58 | 0.38 |
| Pneumonia | 6.65 | 2.18 | 20.25 | 0.00* | 4.68 | 0.83 | 26.29 | 0.08 | 5.83 | 2.17 | 15.70 | 0.00* |
| Bronchitis | 6.03 | 1.94 | 18.70 | 0.00* | 12.05 | 2.45 | 59.28 | 0.00* | 7.84 | 3.00 | 20.51 | 0.00* |
| COPD | 7.49 | 2.22 | 25.27 | 0.00* | 11.08 | 2.05 | 59.92 | 0.01* | 8.99 | 3.21 | 25.16 | 0.00* |
| Bronchiectasis | 2.50 | 0.20 | 31.08 | 0.48 | / | / | / | / | 1.40 | 0.13 | 15.14 | 0.78 |

Notes: Body Mass Index (BMI); Chronic obstructive pulmonary disease (COPD); Serum uric acid (SUA); * P<0.05; / Invalid data

| Supplementary Table S2. Poisson regression models for incident asthma using serum uric acid as a binary independent variable | | | | | | | | | | | | |
| --- | --- | --- | --- | --- | --- | --- | --- | --- | --- | --- | --- | --- |
| Independent variables | Men | | | | Women | | | | Total | | | |
| IRR | 95%CI | | *P* | IRR | 95%CI | | *P* | IRR | 95%CI | | *P* |
| unadjusted covariates |  |  |  |  |  |  |  |  |  |  |  |  |
| SUA | 2.13 | 1.23 | 3.67 | 0.01* | 1.72 | 0.78 | 3.76 | 0.18 | 1.86 | 1.20 | 2.88 | 0.01* |
| adjusted covariates |  |  |  |  |  |  |  |  |  |  |  |  |
| SUA | 2.64 | 1.44 | 4.81 | 0.00* | 1.28 | 0.55 | 2.95 | 0.56 | 2.34 | 1.40 | 3.92 | 0.00* |
| Age | 1.02 | 1.00 | 1.04 | 0.05* | 1.01 | 0.99 | 1.03 | 0.48 | 1.01 | 1.00 | 1.03 | 0.06 |
| BMI | 0.95 | 0.87 | 1.05 | 0.31 | 1.01 | 1.01 | 1.02 | 0.00* | 1.00 | 0.97 | 1.03 | 0.95 |
| Gender | / | / | / | / | / | / | / | / | 1.99 | 1.16 | 3.41 | 0.01* |
| Drinking status | 2.12 | 1.09 | 4.14 | 0.03* | / | / | / | / | 2.02 | 1.04 | 3.92 | 0.04* |
| Smoking status | 1.55 | 0.77 | 3.12 | 0.22 | / | / | / | / | 1.57 | 0.79 | 3.12 | 0.20 |
| Rhinitis | 2.55 | 0.15 | 42.63 | 0.51 | / | / | / | / | 2.11 | 0.17 | 26.76 | 0.57 |
| Nasal polyps | 10.89 | 1.93 | 61.27 | 0.01* | / | / | / | / | 11.21 | 2.40 | 52.37 | 0.00* |
| Pulmonary infection | 0.24 | 0.01 | 3.84 | 0.31 | 1.24 | 0.25 | 6.15 | 0.80 | 0.40 | 0.07 | 2.37 | 0.31 |
| Pneumonia | 6.87 | 2.32 | 20.39 | 0.00* | 4.67 | 0.82 | 26.56 | 0.08 | 6.07 | 2.31 | 15.94 | 0.00* |
| Bronchitis | 6.31 | 2.09 | 19.02 | 0.00* | 11.98 | 2.42 | 59.25 | 0.00* | 8.09 | 3.17 | 20.66 | 0.00* |
| COPD | 7.17 | 2.23 | 23.01 | 0.00* | 10.74 | 2.02 | 57.20 | 0.01* | 8.87 | 3.29 | 23.92 | 0.00* |
| Bronchiectasis | 2.87 | 0.25 | 32.64 | 0.40 | / | / | / | / | 1.53 | 0.15 | 15.36 | 0.72 |

Notes: Body Mass Index (BMI); Chronic obstructive pulmonary disease (COPD); Serum uric acid (SUA); * P<0.05; / Invalid data
